# Supplementary material for: Development and Validation of a Dementia Risk Prediction Model in the General Population: An Analysis of Three Longitudinal Studies
Source: Atypon-hosted journal article supplement (doi:10.1176/appi.ajp.2018.18050566), 2018-12-11
Supplement: appi.ajp.2018.18050566.ds001.pdf [file appi.ajp.2018.18050566.ds001.pdf]

## Contents

**Figure S1.** Flowchart of study participants

**Table S1.** Description of predictors

### Details on brain imaging

**Table S2.** Additional details on the development steps of the statistical model and testing of the assumptions

**Table S3.** Baseline characteristics across the development (Rotterdam Study) and validation (EPOZ, ADNI-1) studies

**Table S4.** Frequencies of selected predictors by lasso using 200 bootstrap samples for the basic and extended model separately, by including all candidate predictors

**Table S5.** Predictive yield of the basic model when adding each domain (cognitive, genetic, and imaging markers) separately

**Table S6.** Model optimism estimated using 200 bootstrap samples

**Table S7.** Summary event table with 10-year cumulative incidence of dementia or competing death in the Rotterdam Study

**Table S8.** Cumulative baseline subdistribution hazard for different predicted time horizons

**Figure S2.** Calibration plots of the basic (left) and extended (right) models in the EPOZ validation cohort to predict 10-year risk of dementia

### Risk score calculation

### Supplementary references

**Figure S1.** Flowchart of study participants

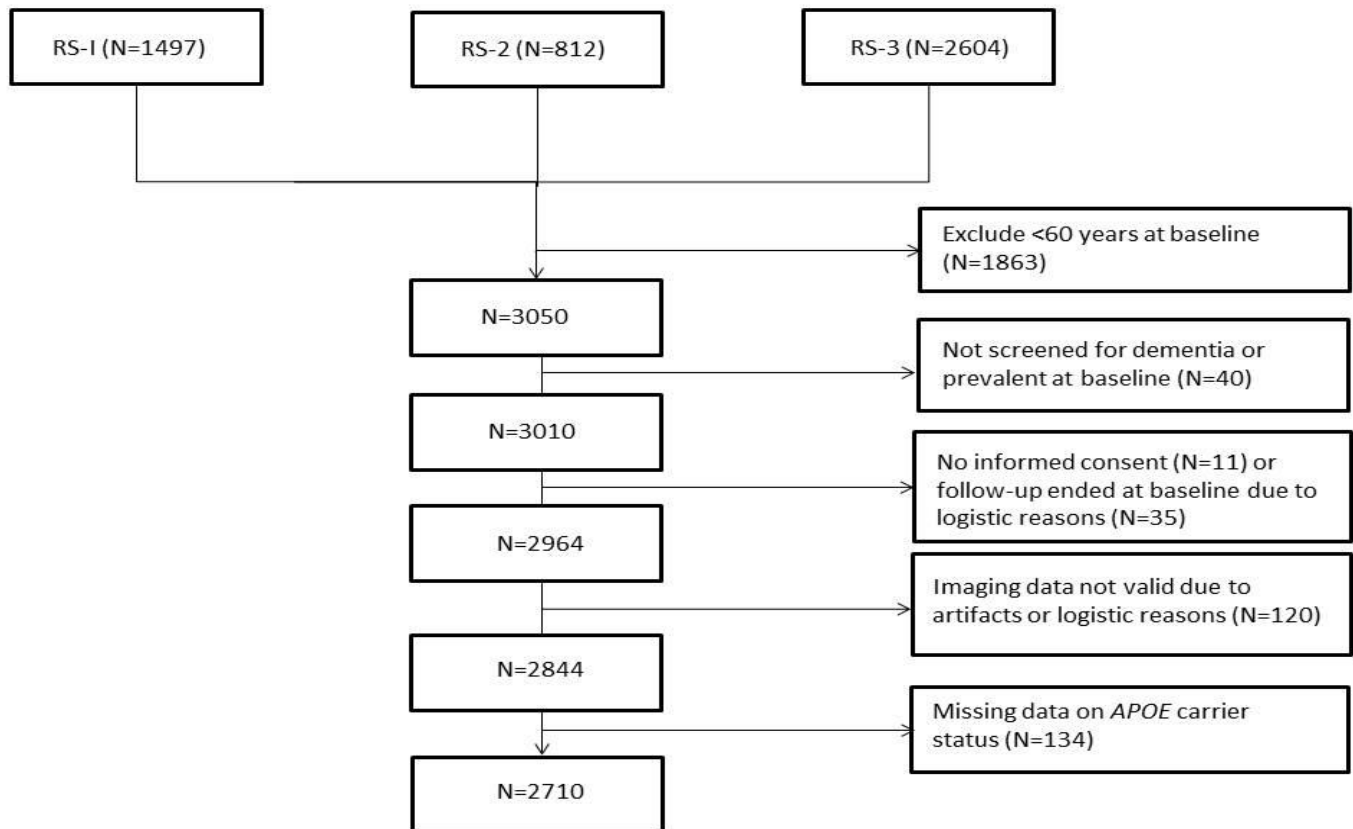

**Abbreviations:** RSS= Rotterdam Scan Study (1995-1996), RS-1, RS-2, RS-3: denote the Rotterdam Study subcohorts.

**Table S1.** Description of predictors

| <b>Variables</b>                           | <b>Description</b>                                                                                                                                                                                                                                                                                                                                                                                                                                                                                                                               |
|--------------------------------------------|--------------------------------------------------------------------------------------------------------------------------------------------------------------------------------------------------------------------------------------------------------------------------------------------------------------------------------------------------------------------------------------------------------------------------------------------------------------------------------------------------------------------------------------------------|
| Age at baseline                            | Age range 60-105 years. Age at baseline was calculated as the age at date of MRI scan date.                                                                                                                                                                                                                                                                                                                                                                                                                                                      |
| Gender                                     | Self-report.                                                                                                                                                                                                                                                                                                                                                                                                                                                                                                                                     |
| Education                                  | The variable education was derived from self-reported history harmonized in years of education according to the UNESCO classification.(1) Scale was created using number of years.                                                                                                                                                                                                                                                                                                                                                               |
| Body mass index                            | Body mass index.                                                                                                                                                                                                                                                                                                                                                                                                                                                                                                                                 |
| Systolic blood pressure                    | Systolic and diastolic blood pressures were assessed at the right arm and the mean of two measurements was used in the analyses.                                                                                                                                                                                                                                                                                                                                                                                                                 |
| Smoking                                    | During a structured interview, smoking status was obtained. Smoking was coded for the analyses as current smoking or never/past smoking.                                                                                                                                                                                                                                                                                                                                                                                                         |
| Parental history of dementia               | Participants were questioned about family history of dementia by trained interviewers using structured questionnaires.(2)                                                                                                                                                                                                                                                                                                                                                                                                                        |
| History of diabetes                        | Diabetes was defined as fasting serum glucose levels $\geq 7.0$ mmol/L or the use of anti-diabetic therapy.                                                                                                                                                                                                                                                                                                                                                                                                                                      |
| History of symptomatic stroke              | At baseline, history of stroke was assessed by interview and verified using medical records. Study participants were continuously followed up for occurrence of incident stroke, by digital linkage of the general practitioners' medical records with the study database.(3) Information from GPs and hospital records was collected from participants with a potential stroke. Research physicians reviewed the information and an experienced vascular neurologist verified the diagnoses according to World Health Organization criteria.(3) |
| Depressive symptoms                        | A structured interview to screen for depressive symptoms was performed by trained interviewers. Participants were screened with the Center for Epidemiologic Studies Depression (CES-D) Scale during home interviews. Depressive symptoms were defined as present with a CES-D score of (20 item) $> 16$ .(4)                                                                                                                                                                                                                                    |
| Subjective memory complaints               | The presence of subjective memory complaints was assessed by question during home interviews by trained interviewers: 'Did you experience more difficulty in remembering?'                                                                                                                                                                                                                                                                                                                                                                       |
| Assistance needed with money or medication | Study participants were enquired about medication use and financial management by trained interviewers with a questionnaire about instrumental activities of daily living (IADL).                                                                                                                                                                                                                                                                                                                                                                |
| <i>APOE-ε4</i> carrier status              | <i>APOE</i> genotype was determined with an one-stage PCR and bi-allelic TaqMan assay(5, 6)                                                                                                                                                                                                                                                                                                                                                                                                                                                      |
| Word Fluency Test (WFT)                    | Mentioning as many animals as possible within one minute. Latent cognitive skills that are tested include the efficiency of searching in long-term memory.(7)                                                                                                                                                                                                                                                                                                                                                                                    |
| Letter Digit Substitution Test (LDST)      | Writing down numbers underneath corresponding letters (range 0–125). Latent cognitive skills that are tested include processing speed, and executive function.                                                                                                                                                                                                                                                                                                                                                                                   |
| Stroop interference task                   | Stroop color-word interference task.(8) Naming colors of color names printed in incongruous ink color(time in seconds taken). Latent cognitive skills that are tested include Interference of automated processing and attention.                                                                                                                                                                                                                                                                                                                |
| Word Learning Test (WLT), delayed          | 15-word verbal learning test based on Rey's recall of words.(9) Delayed recall of words 10 min after visual presentation (range 0–15). latent cognitive skills that are tested include retrieval from verbal memory.                                                                                                                                                                                                                                                                                                                             |
| Hippocampal volume                         | Left and right hippocampal volumes were segmented separately using an automated segmentation method as described in detail earlier.(10) The mean volume of the left and right hippocampus was used in the analyses.                                                                                                                                                                                                                                                                                                                              |

|                                          |                                                                                                                                                                                                                                           |
|------------------------------------------|-------------------------------------------------------------------------------------------------------------------------------------------------------------------------------------------------------------------------------------------|
| Total brain volume                       | Total brain volume was defined as the sum of gray matter and total white matter.(11)                                                                                                                                                      |
| White matter hyperintensity (WMH) volume | White matter hyperintensity volume was calculated by summing the volumes of all white matter lesions detected using an automated post-processing step based on the fluid-attenuated inversion recovery image and the tissue segmentation. |
| Infarcts                                 | Lacunar infarcts were rated visually as focal hyperintensities on T2-images, $\geq 3$ mm in size, and in case of involvement of cortical gray matter, infarcts were classified as cortical infarcts.                                      |

**Abbreviations:** NA=not applicable, PCR-RFLP=Polymerase Chain Reaction-Restriction fragment length polymorphism, GP=general practitioner, and CES-D=Center for Epidemiologic Studies Depression Scale.

## Details on brain imaging

Between 1995 and 1996, brain MRI was performed in the Rotterdam Scan Study on a 1.5-Tesla MRI System (VISION MR, Siemens AG) and included T1, proton-density and T2 scans. In addition, a high-resolution T1, inversion-recovery, 3-D HASTE sequence was acquired. Slice thickness was 5mm for T1, T2 and proton-density sequences, and 1.25 mm for the HASTE sequence. Pre-processing steps, the segmentation algorithm, and validation results have been described previously.(11) Due to the availability of newer MRI techniques and a new MR scanner in 2005, the MRIs from participants included in the Rotterdam Study subcohorts RS-2-2, RS-3-1 and RS-1-5 were performed with a 3D T1-weighted sequence. There was strong correlation between volume measurements across the different MRI sequences derived in a small subsample to estimate the effect of the different MRI sequences. The measurements from both MRI sequences within a short time period were indeed approximately identical. Based on common availability and on literature showing strong associations with cognitive decline and dementia,(12-15) we selected four MRI measures for analysis including white matter hyperintensity (WMH) volume, total brain and hippocampal volume, and infarcts (lacunar/cortical). White matter lesion volume was calculated by summing the volumes of all white matter lesions detected using an automated postprocessing step based on the fluid-attenuated inversion recovery image and the tissue segmentation.(16) Left and right hippocampal volumes were segmented separately using an automated segmentation method as described in detail earlier.(17) The mean volume of the left and right hippocampus was used in the analyses.(10) All segmentations were inspected and manually corrected if required. All scans were appraised by trained research physicians blinded to clinical data for the presence of lacunar and cortical infarcts. Lacunar infarcts were rated visually as focal hyperintensities on T2-images,  $\geq 3$  mm in size, and in case of involvement of cortical gray matter, infarcts were classified as cortical infarcts. WMH, brain and hippocampal volume were all expressed as a percentage of intracranial volume (ICV) to correct for differences in head size.(18)

**Table S2.** Additional details on the development steps of the statistical model and testing of the assumptions

| Assumptions/Modeling Steps                     | Test/comparison/predictor                                                                                                                                                        | Result                                                                                                                                                                                             | Decision                                                           |
|------------------------------------------------|----------------------------------------------------------------------------------------------------------------------------------------------------------------------------------|----------------------------------------------------------------------------------------------------------------------------------------------------------------------------------------------------|--------------------------------------------------------------------|
| Observation of extreme data points (outliers)  | Boxplots used to compare original data with truncated data at 1 <sup>st</sup> and 99 <sup>th</sup> percentile                                                                    | Some evidence for outliers in the following variables: systolic blood pressure, Stroop interference task, LDST, Word Delayed Task, Word Fluency test, hippocampal volume and white matter lesions. | Data winsorized at 1 <sup>st</sup> and 99 <sup>th</sup> percentile |
| Linearity assumptions of continuous predictors | Restricted cubic spline transformation, 2 to 4 knots; LRT test against non-transformed (linear) term and assessed visually by plotting the Martingale residuals.(19)             | Based on BIC values the most parsimonious model chosen.                                                                                                                                            | Reject linearity assumption; age + age <sup>2</sup> appropriate    |
| Proportional subdistribution hazard assumption | -Age<br>-Age+ Age <sup>2</sup><br>-Remaining predictors                                                                                                                          | There was no evidence that these assumptions were evidently violated.                                                                                                                              | Valid use of Fine & Gray model                                     |
| Interactions                                   | -Age * stroke<br>-Age * Memory complaints<br>-Age * ADL<br>-Age * <i>APOE-ε4</i>                                                                                                 | BIC worsened, likelihood only modestly decreased.                                                                                                                                                  | No interactions included in the model                              |
| LASSO penalty                                  | Varying LASSO penalty (lambda), while repeating this approach for 200 bootstrap samples. Subsequently, the most optimal penalty was chosen based on the BIC values of the model. | A consistent selection pattern of predictors was observed.                                                                                                                                         | LASSO penalty was appropriate.                                     |

**Table S3.** Baseline characteristics across the development (Rotterdam Study) and validation (EPOZ, ADNI-1) studies

|                                              | Rotterdam Study<br>N=2710 | Missing data<br>(%) | EPOZ Study, N=514 | Missing data (%) | ADNI-1, N=228 | Missing data<br>(%) |
|----------------------------------------------|---------------------------|---------------------|-------------------|------------------|---------------|---------------------|
| Age, years                                   | 71.2 (8.2)                | 0                   | 70.8 (6.5)        | 0                | 75.9 (4.9)    | 0                   |
| Women                                        | 1430 (52.8%)              | 0                   | 274 (53.3%)       | 0                | 110 (48.0%)   | 0                   |
| Education, years*                            | 10 (7-13)                 | 1.0                 | 10 (7-13)         | 0                | 16 (14-18)    | 0                   |
| Systolic blood pressure, mmHg                | 145 (21)                  | 0.3                 | 149 (23)          | 1.0              | 134.5 (17)    | 0                   |
| Ever smoking                                 | 1884 (69.5%)              | 1.4                 | 326 (63.4%)       | 0                | 85 (37.3%)    | 0                   |
| Current                                      | 446 (16.5%)               |                     | 86 (16.7%)        |                  | -             |                     |
| History of diabetes                          | 345 (12.7%)               | 1.7                 | 38 (7.4%)         | 0                | 18 (7.9%)     | 0                   |
| History of symptomatic stroke                | 106 (3.9%)                | 0                   | 18 (3.5%)         | 0                | 3 (1.3%)      | 0                   |
| Depressive symptoms                          | 457 (16.9%)               | 4.6                 | 39 (7.6%)         | 1.8              | 34 (14.9%)    | 0                   |
| Parental history of dementia                 | 185 (6.8%)                | 19.2                | -                 | -                | 100 (43.9%)   | 0                   |
| Subjective memory decline                    | 903 (33.3%)               | 4.1                 | 177 (34.4%)       | 1.2              | 17 (7.5%)     | 0                   |
| Assistance needed with finance or medication | 262 (9.7%)                | 23.8                | 24 (4.7%)         | 1.4              | 13 (5.7%)     | 0                   |
| <i>APOE</i> - $\epsilon$ 4 carrier           | 759 (28.0%)               | 0                   | 143 (27.8%)       | 4.7              | 61 (26.8%)    | 0                   |
| <b>Cognitive tests</b>                       |                           |                     |                   |                  |               |                     |
| Word Fluency Test, words                     | 21 (5)                    | 2.7                 | 21 (5)            | 0.8              | 20 (5)        | 0                   |
| Letter Digit Substitution Test, letters      | 28 (7)                    | 2.8                 | 27 (7)            | 3.7              | 46 (10)       | 44.6                |
| Stroop Interference Task, seconds            | 57 (27)                   | 6.6                 | 56 (22)           | 2.6              | -             | -                   |
| Delayed Word Learning Test, words            | 7 (3)                     | 7.4                 | 6 (3)             | 0.4              | 6 (2)         | 0.8                 |
| <b>Imaging markers</b>                       |                           |                     |                   |                  |               |                     |
| Total brain volume, mL                       | 880.1 (126.1)             | 1.2                 | 839.8 (100.6)     | 40.1†            | 1008 (100.5)* | 0.9                 |
| Mean hippocampal volume, mL                  | 3.7 (0.5)                 | 3.3                 | 2.7 (0.4)         | 40.1†            | 3.6 (0.4)     | 3.1                 |
| White matter hyperintensity volume, mL**     | 4.7 (0-143.6)             | 1.2                 | 1.5 (0-25.6)      | 40.1†            | 0.24 (0-25.5) | 1.3                 |
| Presence of infarcts                         | 410 (15.1%)               | 0                   | 92 (17.9%)        | 2.9              | 18 (7.9%)     | 0.4                 |

\* Including cerebellar volumes. \*\*Median (range) presented because of skewed distribution. †Due to a data storage issues, some brain volumes were not correctly archived and could therefore not be processed for analysis. These data were most likely missing completely at random, and the distribution of variables was similar across non-imputed and imputed datasets. Abbreviations: EPOZ= Epidemiologic Preventive Investigation Zoetermeer, ADNI= Alzheimer's Disease, Neuroimaging Initiative, N=number of people at risk, *APOE*=apolipoprotein E, mL=milliliters.

**Table S4.** Frequencies of selected predictors by lasso using 200 bootstrap samples for the basic and extended model separately, by including all candidate predictors

| Predictor                                           | No. times selected by Lasso (%) |                  |
|-----------------------------------------------------|---------------------------------|------------------|
|                                                     | Basic model                     | Extended model   |
| <b>Age</b>                                          | <b>200 (100)</b>                | <b>196 (98)</b>  |
| Age <sup>2</sup>                                    | 9 (5)                           | 0 (0)            |
| Sex                                                 | 16 (6)                          | 43 (22)          |
| Education                                           | 18 (9)                          | 11 (6)           |
| History of diabetes                                 | 54 (27)                         | 39 (20)          |
| Depressive symptoms                                 | 37 (19)                         | 62 (31)          |
| <b>Subjective memory complaints</b>                 | <b>154 (77)</b>                 | <b>134 (67)</b>  |
| Systolic blood pressure                             | 30 (15)                         | 22 (11)          |
| Smoking                                             | 23 (12)                         | 43 (22)          |
| Parental history of dementia                        | 15 (8)                          | 23 (12)          |
| <b>Assistance needed with finance or medication</b> | <b>141 (71)</b>                 | <b>141 (71)</b>  |
| <b>History of symptomatic stroke</b>                | <b>154 (77)</b>                 | <b>110 (55)</b>  |
| <i>APOE-ε4</i> carrier                              | -                               | <b>199 (99)</b>  |
| <b>Letter Digit Substitution Test</b>               | -                               | <b>119 (60)</b>  |
| <b>Word Fluency Test</b>                            | -                               | <b>193 (97)</b>  |
| <b>Delayed Word Learning Test</b>                   | -                               | <b>200 (100)</b> |
| Stroop interference task                            | -                               | 74 (37)          |
| <b>Total brain volume</b>                           | -                               | <b>199 (99)</b>  |
| <b>Mean hippocampal volume</b>                      | -                               | <b>200 (100)</b> |
| <b>White matter hyperintensity volume</b>           | -                               | <b>145 (73)</b>  |
| Infarct (cortical / lacunair)                       | -                               | 26 (31)          |

The selected predictors in the final model are shown in bold.



**Table S5.** Predictive yield of the basic model when adding each domain (cognitive, genetic, and imaging markers) separately

|                                 | <b>C-statistic (95% CI)</b> |
|---------------------------------|-----------------------------|
| Basic model + cognitive markers | 0.84 (0.81;0.86)            |
| Basic model + <i>APOE</i>       | 0.81 (0.77;0.84)            |
| Basic model + imaging markers   | 0.83 (0.80;0.86)            |

**Table S6.** Model optimism estimated using 200 bootstrap samples

|                                                         | <b>Original (95% CI)</b> | <b>Selected and shrunken by lasso (95% CI)</b> |
|---------------------------------------------------------|--------------------------|------------------------------------------------|
| <b>Basic model</b>                                      |                          |                                                |
| <b>Optimism (bootstrap estimate – test performance)</b> | 0.016 (0.015;0.016)      | 0.008 (0.007;0.009)                            |
| Optimism corrected estimate                             | 0.778 (0.744;0.818)      | 0.779 (0.745;0.818)                            |
| <b>Extended model</b>                                   |                          |                                                |
| Optimism (bootstrap estimate – test performance)        | 0.015 (0.013;0.017)      | 0.010 (0.009;0.014)                            |
| Optimism corrected estimate                             | 0.854 (0.819;0.887)      | 0.859 (0.826;0.890)                            |

**Table S7.** Summary event table with 10-year cumulative incidence of dementia or competing death in the Rotterdam Study

| <b>Variable</b>                 | <b>Rotterdam Study</b> | <b>EPOZ</b>    | <b>ADNI</b>   |
|---------------------------------|------------------------|----------------|---------------|
| Overall dementia events, n      | 131                    | 36             | 26            |
| Competing non-dementia death, n | 444                    | 120            | 69            |
| Median follow-up, years (IQR)   | 6.6 (4.8-8.9)          | 9.5 (7.6-11.4) | 6.3 (2.0-8.0) |

**Table S8.** Cumulative baseline subdistribution hazard for different predicted time horizons

| <b>Population</b> | <b>3 years</b> | <b>5 years</b> | <b>10 years</b> |
|-------------------|----------------|----------------|-----------------|
| Rotterdam Study   | 0.0174         | 0.0305         | 0.0614          |
| <b>EPOZ</b>       | 0.0098         | 0.0355         | 0.0716          |
| <b>ADNI</b>       | 0.0336         | 0.0401         | 0.1834          |

**Figure S2.** Calibration plots of the basic (left) and extended (right) models in the EPOZ validation cohort to predict 10-year risk of dementia. In case of perfect calibration all groups of predicted probabilities fit close to the red diagonal line, corresponding to an intercept of 0 and a slope of 1 for the calibration plot. Vertical bars in grouped observations represent 95% confidence intervals.

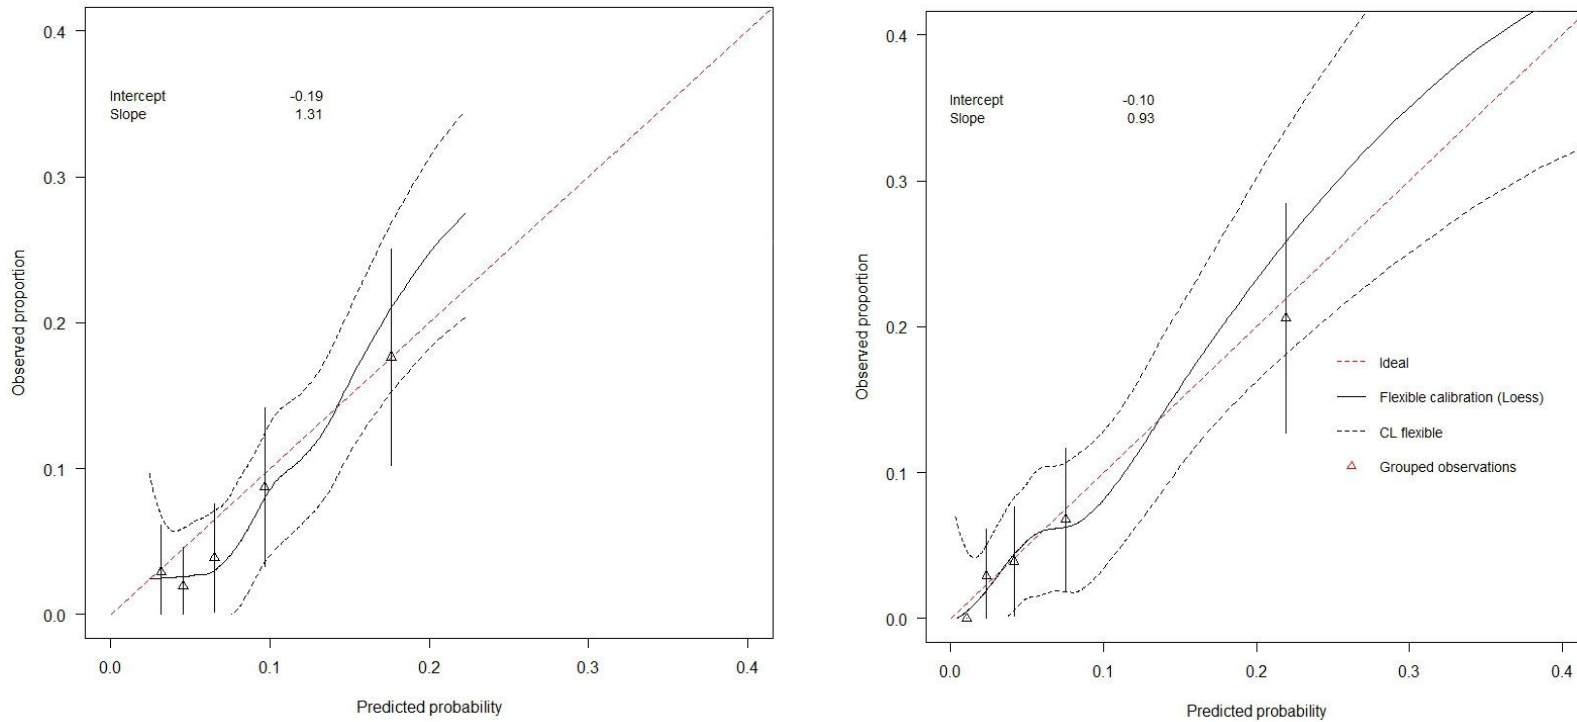

## **Risk score calculation**

Probability of dementia within 10 years:

The baseline cumulative subdistribution hazard refers to a man or woman aged 71 years who does not have subjective memory complaints, did not have a clinical stroke, does not need assistance with money or medication and whose test results are 6.8 words on the Delayed Word Learning Test, 21.1 words on the Word Fluency Test, 28.2 letters on the Digit Letter Substitution Test, is not an *APOE-ε4* carrier, and has a brain volume of 880.1 mL, with a mean hippocampal volume of 3.7 mL and white hypertensity volume of 4.7 mL.

A supplementary excel appendix is available to calculate risks for the extended model.

## Supplementary References

1. United Nations Educational SaCOU. International Standard Classification of Education (ISCED) 1976. Available from: <http://unesdoc.unesco.org/images/0002/000209/020992eb.pdf>.
2. Wolters FJ, van der Lee SJ, Koudstaal PJ, van Duijn CM, Hofman A, Ikram MK, Vernooij MW, Ikram MA. Parental family history of dementia in relation to subclinical brain disease and dementia risk. *Neurology*. 2017;88:1642-1649.
3. Wieberdink RG, Ikram MA, Hofman A, Koudstaal PJ, Breteler MM. Trends in stroke incidence rates and stroke risk factors in Rotterdam, the Netherlands from 1990 to 2008. *Eur J Epidemiol*. 2012;27:287-295.
4. Beekman AT, Deeg DJ, Van Limbeek J, Braam AW, De Vries MZ, Van Tilburg W. Criterion validity of the Center for Epidemiologic Studies Depression scale (CES-D): results from a community-based sample of older subjects in The Netherlands. *Psychol Med*. 1997;27:231-235.
5. Wenham PR, Price WH, Blandell G. Apolipoprotein E genotyping by one-stage PCR. *Lancet*. 1991;337:1158-1159.
6. Woodward J. Bi-allelic SNP genotyping using the TaqMan(R) assay. *Methods Mol Biol*. 2014;1145:67-74.
7. Lezak MD. Neuropsychological assessment in behavioral toxicology--developing techniques and interpretative issues. *Scand J Work Environ Health*. 1984;10 Suppl 1:25-29.
8. Houx PJ, Jolles J, Vreeling FW. Stroop interference: aging effects assessed with the Stroop Color-Word Test. *Exp Aging Res*. 1993;19:209-224.
9. Hoogendam YY, Hofman A, van der Geest JN, van der Lugt A, Ikram MA. Patterns of cognitive function in aging: the Rotterdam Study. *Eur J Epidemiol*. 2014;29:133-140.
10. Ikram MA, van der Lugt A, Niessen WJ, Koudstaal PJ, Krestin GP, Hofman A, Bos D, Vernooij MW. The Rotterdam Scan Study: design update 2016 and main findings. *Eur J Epidemiol*. 2015;30:1299-1315.
11. Ikram MA, Vernooij MW, Vrooman HA, Hofman A, Breteler MM. Brain tissue volumes and small vessel disease in relation to the risk of mortality. *Neurobiol Aging*. 2009;30:450-456.
12. Debette S, Markus HS. The clinical importance of white matter hyperintensities on brain magnetic resonance imaging: systematic review and meta-analysis. *BMJ*. 2010;341:c3666.
13. Jack CR, Jr., Shiung MM, Gunter JL, O'Brien PC, Weigand SD, Knopman DS, Boeve BF, Ivnik RJ, Smith GE, Cha RH, Tangalos EG, Petersen RC. Comparison of different MRI brain atrophy rate measures with clinical disease progression in AD. *Neurology*. 2004;62:591-600.

14. den Heijer T, van der Lijn F, Koudstaal PJ, Hofman A, van der Lugt A, Krestin GP, Niessen WJ, Breteler MM. A 10-year follow-up of hippocampal volume on magnetic resonance imaging in early dementia and cognitive decline. *Brain*. 2010;133:1163-1172.
15. Vermeer SE, Prins ND, den Heijer T, Hofman A, Koudstaal PJ, Breteler MM. Silent brain infarcts and the risk of dementia and cognitive decline. *N Engl J Med*. 2003;348:1215-1222.
16. de Boer R, Vrooman HA, van der Lijn F, Vernooij MW, Ikram MA, van der Lugt A, Breteler MM, Niessen WJ. White matter lesion extension to automatic brain tissue segmentation on MRI. *Neuroimage*. 2009;45:1151-1161.
17. van der Lijn F, den Heijer T, Breteler MM, Niessen WJ. Hippocampus segmentation in MR images using atlas registration, voxel classification, and graph cuts. *Neuroimage*. 2008;43:708-720.
18. Ikram MA, Fornage M, Smith AV, Seshadri S, Schmidt R, Debette S, Vrooman HA, Sigurdsson S, Ropele S, Taal HR, Mook-Kanamori DO, Coker LH, Longstreth WT, Jr., Niessen WJ, DeStefano AL, Beiser A, Zijdenbos AP, Struchalin M, Jack CR, Jr., Rivadeneira F, Uitterlinden AG, Knopman DS, Hartikainen AL, Pennell CE, Thiering E, Steegers EA, Hakonarson H, Heinrich J, Palmer LJ, Jarvelin MR, McCarthy MI, Grant SF, St Pourcain B, Timpson NJ, Smith GD, Sovio U, Early Growth Genetics C, Nalls MA, Au R, Hofman A, Gudnason H, van der Lugt A, Harris TB, Meeks WM, Vernooij MW, van Buchem MA, Catellier D, Jaddoe VW, Gudnason V, Windham BG, Wolf PA, van Duijn CM, Mosley TH, Jr., Schmidt H, Launer LJ, Breteler MM, DeCarli C, Cohorts for H, Aging Research in Genomic Epidemiology C. Common variants at 6q22 and 17q21 are associated with intracranial volume. *Nat Genet*. 2012;44:539-544.
19. Therneau Terry M. GPM, Fleming Thomas R. . Martingale-Based Residuals for Survival Models *Biometrika*. 1990;77:147-160
